# Supplementary material for: Recombinant Dense Granule Protein (NcGRA4) Is a Novel Serological Marker for Neospora caninum Infection in Goats
Source: MDPI journal article supplement (doi:10.3390/ani13111879), 2023-06-05
Supplement: s1 [file s1]

| No               | Sample   | Concentration 1 µg/mL |            | Concentration 2 µg/mL |            |
|------------------|----------|-----------------------|------------|-----------------------|------------|
|                  |          | OD (1:100)            | OD (1:200) | OD (1:100)            | OD (1:200) |
| 1                | Negative | 0.313                 | 0.282      | 0.559                 | 0.393      |
| 2                | Negative | 0.338                 | 0.269      | 0.403                 | 0.337      |
| 3                | Negative | 0.263                 | 0.211      | 0.470                 | 0.313      |
| 4                | Negative | 0.318                 | 0.308      | 0.554                 | 0.441      |
| 5                | Negative | 0.331                 | 0.291      | 0.527                 | 0.448      |
| 6                | Negative | 0.413                 | 0.317      | 0.356                 | 0.300      |
| 7                | Negative | 0.331                 | 0.336      | 0.443                 | 0.309      |
| 8                | Negative | 0.309                 | 0.278      | 0.390                 | 0.378      |
| 9                | Negative | 0.316                 | 0.319      | 0.458                 | 0.342      |
| 10               | Negative | 0.412                 | 0.306      | 0.415                 | 0.388      |
| 11               | Negative | 0.405                 | 0.335      | 0.371                 | 0.352      |
| 12               | Negative | 0.386                 | 0.351      | 0.233                 | 0.216      |
| 13               | Negative | 0.352                 | 0.338      | 0.298                 | 0.275      |
| 14               | Negative | 0.332                 | 0.256      | 0.351                 | 0.321      |
| 15               | Negative | 0.291                 | 0.271      | 0.358                 | 0.339      |
| 16               | Negative | 0.446                 | 0.255      | 0.244                 | 0.159      |
| 17               | Negative | 0.326                 | 0.332      | 0.360                 | 0.219      |
| 18               | Negative | 0.324                 | 0.278      | 0.464                 | 0.299      |
| 19               | Negative | 0.373                 | 0.394      | 0.366                 | 0.293      |
| 20               | Negative | 0.285                 | 0.257      | 0.727                 | 0.274      |
| 21               | Positive | 1.023                 | 0.971      | 1.579                 | 1.503      |
| 22               | Positive | 1.130                 | 1.090      | 1.418                 | 1.301      |
| 23               | Positive | 0.899                 | 0.854      | 1.266                 | 1.177      |
| 24               | Positive | 0.974                 | 1.024      | 1.277                 | 1.197      |
| 25               | Positive | 1.005                 | 0.964      | 1.509                 | 1.300      |
| 26               | Positive | 1.315                 | 1.256      | 1.540                 | 1.434      |
| 27               | Positive | 1.409                 | 1.378      | 1.968                 | 2.002      |
| 28               | Positive | 0.919                 | 0.883      | 1.401                 | 1.465      |
| 29               | Positive | 1.040                 | 0.986      | 1.527                 | 1.600      |
| 30               | Positive | 1.159                 | 1.119      | 1.474                 | 1.436      |
| 31               | Positive | 1.171                 | 1.059      | 1.581                 | 1.499      |
| 32               | Positive | 0.962                 | 0.990      | 1.545                 | 1.600      |
|                  |          |                       |            |                       |            |
| Average Negative |          | 0.343                 | 0.299      | 0.417                 | 0.320      |
| Average Positive |          | 1.084                 | 1.048      | 1.507                 | 1.459      |
| Pos/Neg Ratio    |          | 3.159                 | 3.503      | 3.612                 | 4.566      |
